# Supplementary material for: Exploitation of complement regulatory proteins by Borrelia and Francisella
Source: Royal Society of Chemistry journal article supplement (doi:10.1039/c5mb00027k), 2015-04-08
Supplement: c5mb00027k1.pdf [file c5mb00027k1.pdf]

**Supplementary table 1. Summary of the pathogen OMPs interacting with host rCRPs**

| <b>Pathogen (strain)</b>                        | <b>hC4BP</b>                                               | <b>hFH</b>                          | <b>hVTN</b>                                                    | <b>oC4BP</b>                   | <b>oFH</b>                     | <b>oVTN</b>                            | <b>bFH</b> |
|-------------------------------------------------|------------------------------------------------------------|-------------------------------------|----------------------------------------------------------------|--------------------------------|--------------------------------|----------------------------------------|------------|
| <i>Francisella tularensis holarctica</i> (LVS)  | -                                                          | -                                   | -                                                              | -                              | -                              | #64kDa <sup>++</sup><br>(Lipoprotein)* | -          |
| <i>Francisella tularensis holarctica</i> (Tul4) | -                                                          | -                                   | 160kDa <sup>+++</sup><br>58kDa <sup>+++</sup><br>(Lipoprotein) | -                              | -                              | 58kDa <sup>++</sup><br>(Lipoprotein)   | -          |
| <i>Borrelia afzelii</i> (SKT-4)                 | 41 kDa <sup>+++</sup><br>39 kDa <sup>+++</sup><br>(Vlp)    | 26kDa <sup>+++</sup><br>(BaCRASP-1) | 130kDa <sup>++</sup><br>30kDa <sup>+</sup>                     | -                              | -                              | -                                      | -          |
| <i>B.b. s.s.</i> (SKT-2)                        | 41 kDa <sup>+++</sup><br>(VlpA18)<br>20 kDa <sup>+++</sup> | 26kDa <sup>+++</sup><br>(FHBP)      | -                                                              | 34kDa <sup>+++</sup><br>(OspA) | 26kDa <sup>+++</sup><br>(FHBP) | -                                      | -          |
| <i>Borrelia garinii</i> (Rio2)                  | -                                                          | -                                   | 55kDa <sup>++</sup>                                            | -                              | -                              | -                                      | -          |
| <i>Borrelia garinii</i> (PBi)                   | 35 kDa <sup>+++</sup><br>(Osp)                             | 19kDa <sup>+++</sup><br>(BG0407)    | 45kDa <sup>+</sup>                                             | -                              | -                              | -                                      | -          |
| <i>Borrelia garinii</i> (G117)                  | -                                                          | 26kDa <sup>+</sup>                  | 45kDa <sup>+</sup>                                             | -                              | -                              | -                                      | -          |
| <i>Borrelia garinii</i> (SKT-3)                 | 39 kDa <sup>+++</sup><br>(Vlp)<br>30 kDa <sup>+</sup>      | -                                   | 37kDa <sup>+++</sup><br>(Vlp)                                  | -                              | -                              | -                                      | -          |
| <i>Borrelia garinii</i> (T25)                   | 49kDa <sup>+++</sup>                                       | 17kDa <sup>++</sup>                 | -                                                              | -                              | -                              | -                                      | -          |

|                                      |                                                                     |                                                                |                    |   |                                     |   |                               |
|--------------------------------------|---------------------------------------------------------------------|----------------------------------------------------------------|--------------------|---|-------------------------------------|---|-------------------------------|
| <i>Borrelia valaisiana</i> (VS116)   | 43 kDa <sup>+</sup>                                                 | 17kDa <sup>+++</sup>                                           | 48kDa <sup>+</sup> | - | -                                   | - | -                             |
| <i>Borrelia andersonii</i> (21123)   | -                                                                   | 15kDa <sup>+</sup><br>17kDa <sup>+</sup><br>23kDa <sup>+</sup> | 43kDa <sup>+</sup> | - | -                                   | - | -                             |
| <i>Borrelia lusitaniae</i> (Poti B2) | 34 kDa <sup>+</sup>                                                 | -                                                              | -                  | - | -                                   | - | -                             |
| <i>Borrelia bissettii</i> (DN127)    | 33 kDa <sup>+</sup><br>45kDa <sup>+</sup>                           | 22kDa <sup>+</sup>                                             | -                  | - | 26kDa <sup>+++</sup><br>(BbCRASP-1) | - | -                             |
| <i>Borrelia japonica</i> (HO14)      | 34 kDa <sup>+</sup><br>49kDa <sup>+</sup>                           | 22kDa <sup>+</sup>                                             | -                  | - | -                                   | - | -                             |
| <i>Borrelia hermsii</i> (HS1)        | 28 kDa <sup>+++</sup><br>(Vmp)<br>41 kDa <sup>+++</sup><br>(VlpA18) | 20kDa <sup>+++</sup><br>(FhbA)                                 | -                  | - | -                                   | - | -                             |
| <i>Borrelia parkeri</i> (M3001)      | 39 kDa <sup>++</sup>                                                | 23kDa <sup>+++</sup>                                           | -                  | - | -                                   | - | -                             |
| <i>Borrelia anserina</i> (ES-1)      | 39 kDa <sup>+</sup>                                                 | -                                                              | 51kDa <sup>+</sup> | - | -                                   | - | -                             |
| <i>Borrelia coriaceae</i> (Co53)     | 140 kDa <sup>++</sup>                                               | -                                                              | -                  | - | -                                   | - | 60kDa <sup>+</sup><br>(BESBP) |

*Strain name is indicated in parenthesis after the Borrelia or Francisella species. # The molecular masses determined from the western blot assays are presented. Unidentified proteins were processed with pull-down assay but due to their low abundance, their detection on the gel was not achieved. FH binding strength. +++ high; ++ medium; + weak; - negative. \* depicts proteins identified by mass spectrometry.*
