# Supplementary material for: Exploitation of complement regulatory proteins by Borrelia and Francisella
Source: Royal Society of Chemistry journal article supplement (doi:10.1039/c5mb00027k), 2015-04-08

### Supplementary Fig. 1. Confirmation of recombinant proteins

Presence of recombinant proteins after affinity chromatography was confirmed by SDS-PAGE and western blotting with nickel-HRP conjugate.

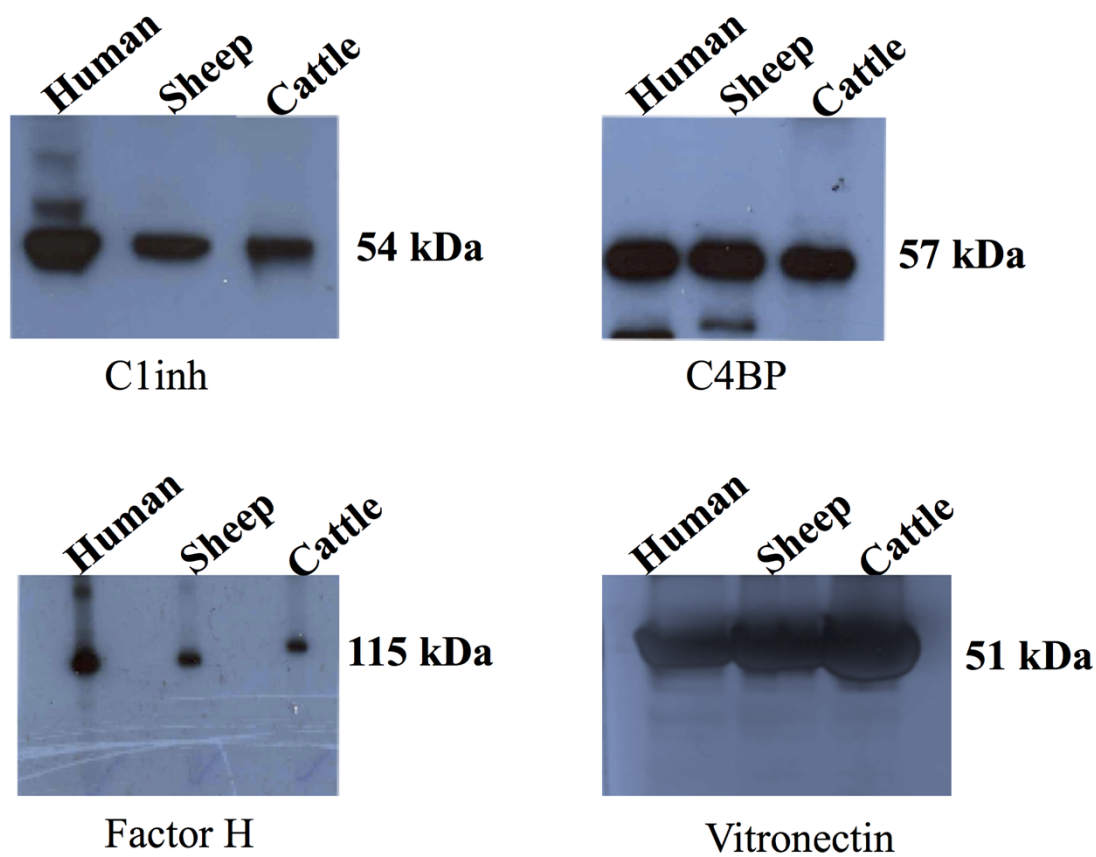

Supplement: c5mb00027k3.pdf [file c5mb00027k3.pdf]
